# Supplementary material for: Essential role of RSK2 in c-Fos–dependent osteosarcoma development
Source: JCI journal article supplement (doi:10.1172/jci22877), 2005-03-01
Supplement: sd1 [file 1]

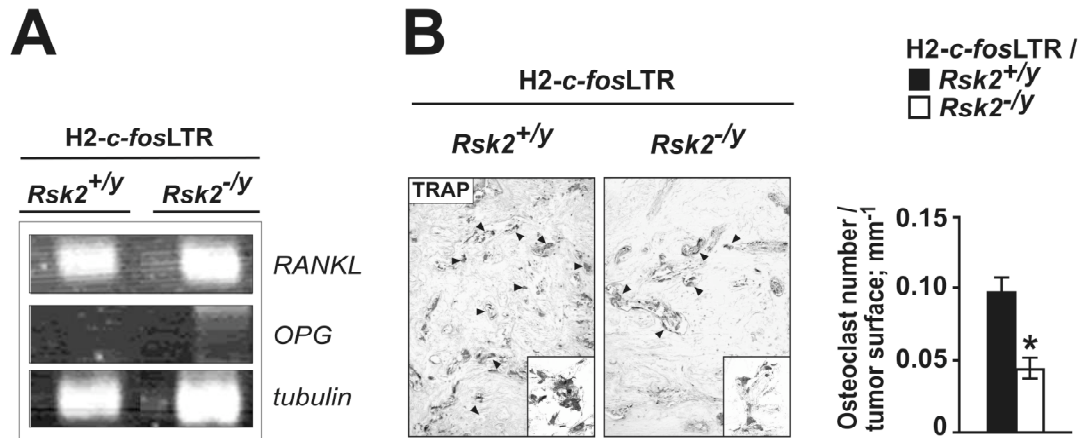

**Supplementary figure S1** Decreased osteoclast numbers in RSK2-deficient

osteosarcomas. (A) RT-PCR analysis of RANKL and OPG expression from long bones of 8 week old H2-*c-fos*LTR and H2-*c-fos*LTR/*Rsk2*<sup>-/*y*</sup> mice. (B) Determination of osteoclast numbers in tumor sections from H2-*c-fos*LTR and H2-*c-fos*LTR/*Rsk2*<sup>-/*y*</sup> littermates. Osteoclasts are shown by TRAP staining (black arrows) and counted; a higher magnification is shown in the insets in the lower right corner.
